# Supplementary material
Source: MDPI journal article supplement (https://www.mdpi.com/1099-4300/18/3/66)
Supplement: s1 [file s1]

Supplementary Materials: Correlation between the Increasing Conductivity of Aqueous Solutions of Cation Chlorides with Time and the “Salting-Out” Properties of the Cations

Nada Verdel and Peter Bukovec

1. Experimental

1.1. Introduction to the Conductivity Measuring System

Due to the use of platinized electrodes and dilute solutions, some measurements were inconsistent, so the average of eight to ten measurements of the sample was calculated and only if the relative standard error (RSE) of the measurements was less than 1%, was the average considered as a valid result (see example in Table S1).

**Table S1.** Example of eight conductivity measurements of 0.1 mmol/L LiCl at 0.120, 1, 10 and 100 kHz and 25 °C in a thermostat bath of distilled water. Descriptive statistics: averages (AVG), standard deviations (SD), standard errors (SE) and relative standard errors (RSE).

| **Descriptive Statistics** | ***σ*** | | | |
| --- | --- | --- | --- | --- |
| **120 Hz** | **1 kHz** | **10 kHz** | **100 kHz** |
| 1. *σ* (µS/cm) | 12.13 | 12.42 | 12.33 | 10.87 |
| 1. *σ* (µS/cm) | 12.13 | 12.41 | 12.31 | 10.86 |
| 1. *σ* (µS/cm) | 12.12 | 12.40 | 12.32 | 10.85 |
| 1. *σ* (µS/cm) | 12.11 | 12.40 | 12.31 | 10.85 |
| 1. *σ* (µS/cm) | 12.11 | 12.40 | 12.31 | 10.84 |
| 1. *σ* (µS/cm) | 12.11 | 12.40 | 12.32 | 10.85 |
| 1. *σ* (µS/cm) | 12.12 | 12.40 | 12.32 | 10.85 |
| 1. *σ* (µS/cm) | 12.12 | 12.40 | 12.32 | 10.85 |
| AVG *σ* (µS/cm) | 12.12 | 12.40 | 12.32 | 10.85 |
| SD (µS/cm) | 0.0082 | 0.0068 | 0.0073 | 0.0081 |
| SE (µS/cm) | 0.0029 | 0.0024 | 0.0026 | 0.0029 |
| RSE (%) | 0.024 | 0.019 | 0.021 | 0.026 |

The measuring cell was regularly calibrated by means of a 0.0002 M standard KCl solution. The conductivity values of KCl solution at 1 kHz and 20 °C were compared to the ICUMSA conductivity value [1] (26.6 ± 0.3 µS/cm).

In our previous work [2] the repeatability of the measuring system was tested by conductivity measurements of 10 replicates of 0.5 mmol/L NaHCO3 at 25 °C. Before each measurement the measuring cell was removed and re-inserted into the flask. Each measurement was repeated ten times and the calculated RSE was 0.7%. For this work the repeatability was tested for three replicates of
0.1 mmol/L CsCl solutions. RSE of the conductivity measurements at 25 °C and 1 kHz was 0.7%.
We presumed that three replicates of fresh solutions were accurate enough for calculating the starting-point conductivity.

The influence of the dielectric constant of the thermostat bath on the conductivity measurements at higher frequencies was evaluated [2]. The conductivity values of three systems with thermostat baths of different dielectric constants were compared. As thermostat baths, distilled water with *ε*~80, edible oil with *ε*~2.5 and air with *ε*~1 were used. The conductivity values at 10 and 100 kHz strongly depended on the dielectric constant of the thermostat bath into which the measuring flasks were placed during the measurements. Because for this work the thermostat bath was simply filled with distilled water, only conductivities at 1 kHz, that proved to be independent from the *ε* of the thermostat bath, were compared.

1.2. Testing the Working Hypothesis

The working hypothesis was tested by conductivity measurements in 2.5 mL flasks. In first series, the dependence of the conductivity on the time for 0.05 mmol/L CsCl and KCl was measured for 35 days. No thermostat bath was used and the conductivity was simply adjusted to 25 °C with coefficient 2%/°C. In second series, the repeatability of increase in conductivity of CsCl, LiCl, KCl and MgCl2 solutions was statistically determined by two preparations of the solutions in two different time scales (see Table S2). Conductivity was measured at 25 °C with a thermostat bath of distilled water. For both series only conductivities at 1 kHz were compared.

**Table S2.** Repeatability of ageing according to increase in conductivity (*Δσ*); statistical data.

| **Statistical Factors** | ***Δσ*****at 1 kHz** |
| --- | --- |
| studied factor | preparation (14 days, 16 days) |
| disturbing factors | different first and final days of ageing |
| experimental units | 2.5 mL flasks |
| number of replicates | 14 days: 4 (average of 4–13 replicates),  16 days: 4 (average of 4–5 replicates) |
| outcome of the experiment | Increase in conductivity Δ*σ* |
| normal distribution | Yes; Shapiro–Wilk: 14 days *p =* 0.808; 16 days *p =* 0.366 |
| variances | homogeneous (Levene test: *p =* 0.185) |
| statistical analysis | *t*-test |

Increase in conductivity (Δ*σ*) was calculated by subtracting conductivity of aged solutions (*σ*) with the starting-point conductivity (*σ0*): Δ*σ* = *σ* – *σ*0*.* Approximate increase in theoretical conductivity (Δ*σ*t) was calculated via Equation (S1):

| Δ*σ*t = Σ*λ*i*c*i | (S1) |
| --- | --- |

Here *λ*i at 25 °C (S·cm2/mol): *λ*Na = 50.1, *λ*K = 73.5, *λ*Mg = 106.2 and *λ*Ca = 119 [3]; *ci* denote concentration of the cation obtained by ICP-OES or ICP-MS analyses. For Δ*σ*t, only the concentrations of cations released from glass were considered. Since limiting molar conductivity values are higher than molar conductivities in real solutions, only a trend in excess conductivity (*σ*E) can be deduced by subtracting *σ*E = Δ*σ* − Δ*σt*.

2. Results and Discussion

2.1. Repeatability of Conductivity Measurements

The repeatability of conductivity measurements was tested by measuring ten replicate solutions of 0.5 mmol/L NaHCO3 (see Table S3). Each replicate solution was measured ten times. Before each measurement the measuring cell was removed and re-inserted into the flask and the average value was considered as the result, if the RSE was less than 1%.

**Table S3.** Repeatability of the conductivity of 10 replicate solutions of 0.5 mmol/L NaHCO3 measured at 25 °C and four frequencies in 20 mL flasks. Descriptive statistics of conductivity with AVG, SD, SE, N and RSE is added.

| ***f*/kHz** | **0.120** | **1** | **10** | **100** |
| --- | --- | --- | --- | --- |
| AVG *σ* (µS/cm) | 50.5 | 50.6 | 51.2 | 51.9 |
| SD (µS/cm) | 0.97 | 0.97 | 1.03 | 1.20 |
| N (/) | 10 | 10 | 10 | 10 |
| SE (µS/cm) | 0.31 | 0.31 | 0.33 | 0.38 |
| RSE (%) | 0.6 | 0.6 | 0.6 | 0.7 |

2.1.1. First Series

**Table S4.** Conductivity of 0.05 mmol/L CsCl and KCl at 0.12, 1, 10 and100 kHz and 25 °C in dependence of time; *σ* measured without a thermostat bath, *T* adjusted to 25 °C with coefficient 2 %/°C.

| **Ion** | **t (day)** | ***σ* (μS/cm)** | | | | **N (/)** | **RSE (%)** |
| --- | --- | --- | --- | --- | --- | --- | --- |
| **120Hz** | **1 kHz** | **10 kHz** | **100 kHz** |
| **Cs** | 1 | 7.94 | 8.05 | 8.13 | 8.40 | 1 | 0.0 |
| 5 | 9.70 | 9.82 | 9.91 | 10.21 | 8 | 1.6 |
| 14 | 10.81 | 10.96 | 11.06 | 11.39 | 8 | 2.5 |
| 21 | 11.96 | 12.12 | 12.23 | 12.56 | 8 | 3.0 |
| 35 | 13.96 | 14.19 | 14.32 | 14.69 | 7 | 1.9 |
| **K** | 1 | 7.70 | 7.80 | 7.88 | 8.14 | 1 | 0.0 |
| 5 | 9.41 | 9.53 | 9.61 | 9.89 | 7 | 3.7 |
| 14 | 9.47 | 9.60 | 9.69 | 9.98 | 6 | 3.1 |
| 21 | 10.72 | 10.87 | 10.97 | 11.28 | 6 | 3.6 |
| 35 | 11.47 | 11.63 | 11.74 | 12.05 | 6 | 3.4 |

2.1.2. Second and Third Series

The repeatability of conductivity after ageing was tested by measuring thirteen replicate solutions of 14 days aged 0.1 mmol/L CsCl (see Table S5).

**Table S5.** Repeatability of the conductivity of 13 replicate solutions of 14-days aged 0.1 mmol/L CsCl measured at 25 °C and 1 kHz in a thermostat bath of distilled water. Descriptive statistics of conductivity with AVG, SD, SE and RSE.

| **Descriptive Statistics** | **Values** |
| --- | --- |
| AVG *σ* (µS/cm) | 25.2 |
| SD (µS/cm) | 1.5 |
| SE (µS/cm) | 0.4 |
| RSE (%) | 1.7 |

The relative standard error (RSE) of the conductivity measurements of thirteen replicates of
14-days aged 0.1 mmol/L CsCl at 25 °C and 1 kHz was 1.7% (see Table S5) due to dissolution of glass.

Furthermore, the repeatability of the increase in conductivity was tested by two preparations of CsCl, LiCl, MgCl2 and KCl solutions, prepared at different time periods, aged for 14 or 16 days (see Table S6). The increase in conductivity after ageing of the prepared solutions at 1 kHz was statistically compared, see more in Table S2. Additionally, the third series of cation chlorides was prepared and measured in inert atmosphere (see Tables S6 and S7 and Figure S1).

**Table S6.** Repeatability of ageing—*σ* and increase in conductivity (Δ*σ*) with descriptive statistics for the cation chloride aged solutions, *σ* measured at 25 °C and 1 kHz.

| **Ion** | **Descriptive Statistics** | ***σ* (pH 7)** | | | ***σ* (pH 7)** | | | ***σ*inert (pH 9*)*** | | |
| --- | --- | --- | --- | --- | --- | --- | --- | --- | --- | --- |
| **Day 2** | **Day 14** | **Δ*σ*** | **Day 1** | **Day 16** | **Δ*σ*** | **Day 1** | **Day 15** | **Δ*σ*** |
| **Cs** | **AVG (μS/cm)** | **17.9** | **25.2** | **7.3** | **16.9** | **23.2** | **8.9** | **20.9** | **29.1** | **8.2** |
| SD (μS/cm) | 0.3 | 1.5 | – | 0.2 | 0.9 | – | 0.6 | 1.1 | – |
| SE (μS/cm) | 0.2 | 0.4 | – | 0.1 | 0.4 | – | 0.2 | 0.3 | – |
| N (/) | 3 | 13 | – | 3 | 5 | – | 14 | 15 | – |
| RSE (%) | 1.0 | 1.7 | – | 0.7 | 1.8 | – | 0.8 | 1.0 | – |
| **Li** | **AVG (μS/cm)** | **14.3** | **20.3** | **6.0** | **12.3** | **21.4** | **9.1** | **16.3** | **24.4** | **8.1** |
| SD (μS/cm) | 0.7 | 0.2 | – | 0.1 | 0.9 | – | 0.7 | 1.8 | – |
| SE (μS/cm) | 0.4 | 0.1 | – | 0.08 | 0.4 | – | 0.2 | 0.5 | – |
| N (/) | 3 | 4 | – | 3 | 5 | – | 15 | 15 | – |
| RSE (%) | 2.6 | 0.5 | – | 0.6 | 1.8 | – | 1.2 | 1.9 | – |

**Table S6.** *Cont.*

| **Ion** | **Descriptive Statistics** | ***σ* (pH 7)** | | | ***σ* (pH 7)** | | | ***σ*inert (pH 9*)*** | | |
| --- | --- | --- | --- | --- | --- | --- | --- | --- | --- | --- |
| **Day 2** | **Day 14** | **Δ*σ*** | **Day 1** | **Day 16** | **Δ*σ*** | **Day 1** | **Day 15** | **Δ*σ*** |
| **K** | **AVG (μS/cm)** | **17.9** | **23.8** | **5.9** | **16.5** | **23.2** | **6.6** | **21.1** | **28.2** | **7.1** |
| SD (μS/cm) | 0.7 | 1.4 | – | 0.3 | 0.9 | – | 0.6 | 1.2 | – |
| SE (μS/cm) | 0.4 | 0.6 | – | 0.2 | 0.4 | – | 0.2 | 0.3 | – |
| N (/) | 3 | 6 | – | 3 | 5 | – | 15 | 15 | – |
| RSE (%) | 2.2 | 2.4 | – | 1.0 | 1.8 | – | 0.8 | 1.2 | – |
| **Mg** | **AVG (μS/cm)** | **15.8** | **20.0** | **4.8** | **14.1** | **19.8** | **5.7** | **17.8** | **24.3** | **6.5** |
| SD (μS/cm) | 0.4 | 1.0 | – | 0.1 | 0.3 | – | 0.5 | 0.9 | – |
| SE (μS/cm) | 0.3 | 0.5 | – | 0.07 | 0.1 | – | 0.1 | 0.2 | – |
| N (/) | 3 | 4 | – | 3 | 5 | – | 14 | 14 | – |
| RSE (%) | 1.6 | 2.4 | – | 0.5 | 0.7 | – | 0.8 | 1.0 | – |

**Table S7.** Repeatability of the conductivity of 14 replicate solutions of 1 and 15 days aged 0.1 mmol/L MgCl2 measured at 25 °C and 1 kHz. Descriptive statistics of conductivity with AVG, SD, SE and RSE.

| **Descriptive statistics** | **Day 1** | **Day 15** |
| --- | --- | --- |
| 1. *σ* (µS/cm) | 17.3 | 22.6 |
| 1. *σ* (µS/cm) | 17.0 | 22.5 |
| 1. *σ* (µS/cm) | 17.4 | 23.9 |
| 1. *σ* (µS/cm) | 17.4 | 24.2 |
| 1. *σ* (µS/cm) | 17.9 | 24.4 |
| 1. *σ* (µS/cm) | 18.2 | 24.3 |
| 1. *σ* (µS/cm) | 18.0 | 25.1 |
| 1. *σ* (µS/cm) | 17.4 | 24.2 |
| 1. *σ* (µS/cm) | 17.3 | 24.5 |
| 1. *σ* (µS/cm) | 18.8 | 25.1 |
| 1. *σ* (µS/cm) | 17.7 | 24.5 |
| 1. *σ* (µS/cm) | 18.4 | 25.2 |
| 1. *σ* (µS/cm) | 18.2 | 25.5 |
| 1. *σ* (µS/cm) | 17.7 | 23.6 |
| AVG *σ* (µS/cm) | 17.8 | 24.3 |
| SD(µS/cm) | 0.5 | 0.9 |
| SE(µS/cm) | 0.1 | 0.2 |
| RSE (%) | 0.8 | 1.0 |

**Figure S1.** Conductivity values after ageing *vs.* Setchenov coefficient for salting-out of benzene of the cation chloride (*k*s); conductivity measured at 25 °C and 1 kHz. RSE 1.0%, 2.5% and 1.8% for 15 days pH9, 14 days pH7 and 16 days pH 7, respectively.

Excess conductivity values were calculated via equation *σ*E = Δ*σ* – Δ*σ*t; Δ*σ* denotes increase in measured conductivity at 25 °C and 1 kHz after ageing and Δ*σt* denotes approximate theoretical increase in conductivity. Δ*σt* was calculated via Equation (S1) by regarding theoretical conductivity of all possible ions that could leach out of glass during ageing.

The repeatability of conductivity measurements was tested by measuring fourteen replicate solutions of 0.1 mmol/L MgCl2 fifteen days aged under inert conditions (see Table S7). Each replicate solution was measured ten times.

References

1. Regulation (EEC) No 1265/69 of the Commission of 1 July 1969. Available online: http://eur-lex.europa.eu/
   legal-content/EN/TXT/PDF/?uri=CELEX:31969R1265&from=EN (accessed on 16 February 2016).
2. Verdel, N.; Jerman, I.; Krašovec, R.; Bukovec, P.; Zupančič, M. Possible time-dependent effect of ions and hydrophilic surfaces on the electrical conductivity of aqueous solutions. *Int. J. Mol. Sci.* **2012**, *13*, 4048–4068.
3. MacInnes, D.A. *Principles of Electrochemistry*; Reinhold Publishing Corporation: New York, NY, USA, 1939.
